# Supplementary material for: Extending the scope of the capture-recapture experiment: a multilevel approach with random effects to provide reliable estimates at national level
Source: publisher site journal article supplement (doi:10.1515/em-2025-0011), 2025-01-01
Supplement: Supplementary file 1 [file j_em-2025-0011_suppl_001.docx]

**Supplemental material 1. Stata® codes.**

* CLUSTER = single random intercept cluster variable

* DV = dependent variable

* IV = independent variable

* Restrict analysis to at least 10 individuals per cluster (Hox 2010)

egen ncl=group(CLUSTER)

lab var ncl "Nb individuals per cluster"

* Run the multilevel logit model. Here, SE are robust (vce() option)

melogit DV IV1 IV2 IV3... if ncl>9 || CLUSTER :, vce(r)

* Request fixed and random effects

predict fe, xb

predict re, reffects reses(rese)

* Note: fixed and random effects can be jointly estimated by:

* predict fere, eta

* Retrieve variance of RE effects

* Level-1 variance (logistic)

scalar tau1=c(pi)^2/3

* Level-2 variance (model)

scalar tau2=_b[var(_cons[CLUSTER]):_cons]

* Calculate the FE and the FE+RE geometric estimators - central estimate

g gfc=1/(exp(fe)) if pdu==1 & ncl>9

lab var gfc "FE only censored geometric - central estimate"

g grc=1/(exp(fe+re)) if ncl>9

lab var grc "FE+RE censored geometric - central estimate"

quiet total grc, cformat(%9.0f)

mat G=r(table)

* Output - CL method 1

dis as text "Central estimate:" as result %9.0f G[1,1]

dis as text "Lower limit (m1):" as result %9.0f G[1,1]-1.96*sqrt(G[1,1]^2+e(N)^2*(tau1+tau2)) as text "Upper limit (m1):" as result %9.0f G[1,1]+1.96*sqrt(G[1,1]^2+e(N)^2*(tau1+tau2))

* Note: if overly conservative CL then switch to method 2

* Output - CL method 2

dis as text "Central estimate:" as result %9.0f G[1,1]

dis as text "Lower limit (m2):" as result %9.0f G[1,1]-1.96*sqrt(G[1,1]^2/e(N)*(tau1+tau2)) as text "Upper limit (m2):" as result %9.0f G[1,1]+1.96*sqrt(G[1,1]^2/e(N)*(tau1+tau2))
